# Supplementary material for: Genetic Disruption of Cilia-Associated Signaling Pathways in Patients with VACTERL Association
Source: MDPI journal article supplement (doi:10.3390/children10050882), 2023-05-14
Supplement: s1 [file s1]

## *Supplementary Material*

### **Supplementary tables:**

**Table S1**

**Table S2**

**Table S3**

**Table S4**

**Table S1.** Forward and reverse primers sequences and additional data for sanger sequenced genes.

| Patient | Gene                 | Sequenz Primer Forward     | GC %  | Sequenz Primer Reverse     | GC %  | Product size | Annealing Temp in °C |
|---------|----------------------|----------------------------|-------|----------------------------|-------|--------------|----------------------|
| VCK 1   | <i>FAT1</i>          | ACATGACTTTCGTTTCATG GTTCT  | 39.10 | GGACCAAATGGTGGGAG GAG      | 60.00 | 398          | 59                   |
| VCK 4   | <i>FAT1</i>          | GCTGGCGTATGCTACAG AGG      | 60.00 | TGGACAGAATTTGTAACC TCACTG  | 41.70 | 750          | 60                   |
| VCK 6   | <i>GLI1</i>          | GGAACCTACAGCCAGTG TCC      | 60.00 | TGCGATCTGTGATGGATG AGA     | 47.60 | 962          | 59                   |
| VCK 3   | <i>AXIN1</i>         | CCTCAGCACACGCTGTACG        | 63.16 | GTGTCACAAGCTGCCTCC C       | 63.16 | 139          | 60                   |
| VCK 3   | <i>DNAH2</i>         | TCATCACCCACCATCTA CTCAG    | 50.00 | CGCCGTTGATGAGGGTC          | 64.71 | 136          | 60                   |
| VCK 4   | <i>IQCE</i>          | GGTTCAGTGTCTCTTTTC TGGG    | 50.00 | TGTGATCTGACTGGCTCT GC      | 55.00 | 139          | 60                   |
| VCK 4   | <i>PGK2</i>          | ATTGACAGGACCATGAG CCA      | 50.00 | CGGATGCTTTATGGGGCA GA      | 55.00 | 761          | 60                   |
| VCK 5   | <i>FAT2</i>          | CCGTCTCCATGACCGTA AAG      | 55.00 | ATCAAGGCAACAGACAG TGG      | 50.00 | 139          | 60                   |
| VCK 5   | <i>FAT4</i>          | TGATAACAACCCCATCT TTGC     | 42.86 | CACCTGTGACAGAGTCTA TCCG    | 54.55 | 185          | 60                   |
| VCK 5   | <i>CATSP<br/>ERG</i> | ACACGAGCACCTACTGCAAC       | 55.00 | CCCACCCAGTAGGGCAG          | 70.59 | 128          | 60                   |
| VCK 5   | <i>EFHC1</i>         | GCCAAGTTGAACTCCCT ACTTTTAG | 44.00 | GATAGTAATGAATGATGT AGGTCCG | 40.00 | 137          | 60                   |
| VCK 10  | <i>KREME<br/>N2</i>  | GCAGTAACCCAGACGGT GAC      | 60.00 | GTTCCACCTCTGTCCAG C        | 63.16 | 127          | 60                   |
| VCK 10  | <i>AP2A2</i>         | GTCTCATTGCCTGTGCTG TC      | 55.00 | GTGCAGCTTCAGGAGCC          | 64.71 | 168          | 60                   |
| VCK 10  | <i>EZR</i>           | TCCTGACTTGCCTTCTTA TCC     | 47.62 | CTCTCTCTCTCACGCAGG TG      | 60.00 | 124          | 60                   |
| VCK 11  | <i>CCDC6<br/>3</i>   | CTGCTGAAGCTGGCTGA GAG      | 60.00 | TCTCCATGTCGTTGTTGAG C      | 50.00 | 118          | 60                   |
| VCK 11  | <i>DNAH1<br/>1</i>   | TCAGAAATTCTTGAGAA ACCCC    | 40.91 | CCATAATCAATATGCTGC CG      | 45.00 | 164          | 60                   |
| VCK 11  | <i>NPHP4</i>         | CACACGAGCCAGGAGG C         | 70.59 | CAAAGGTGTCTTCGTGCT GC      | 55.00 | 141          | 60                   |
| VCK 13  | <i>PLCB3</i>         | TTCTATACCCAGCCAGAGCC       | 55.00 | CAGGACCTGCTGCTGCC          | 70.59 | 138          | 60                   |
| VCK 13  | <i>CACNA<br/>1F</i>  | AACCGGATCCCAGGAA GTAG      | 55.00 | TTCCATCATGAAGGCTCT GG      | 50.00 | 137          | 60                   |
| VCK 13  | <i>POC1A</i>         | GATGACGGGTGAACCCA C        | 61.11 | GCAGGAGTGTGGAGTCTG TG      | 60.00 | 140          | 60                   |
| VCK 14  | <i>OFD1</i>          | TTTAGTCTGTGGAATA GACACAT   | 37.50 | GCTTTCGGTCATAGGTCT CCT     | 52.38 | 196          | 60                   |
| VCK 14  | <i>AES</i>           | GAGGCTTCGGCTCCACC          | 70.59 | tcacaagaatgGCTTCCCTC       | 50.00 | 406          | 60                   |
| VCK 14  | <i>CACNA<br/>1F</i>  | GCCCTCTTCAGCCATAG AAC      | 55.00 | GAAGCAGCAGATGGAGG AAG      | 55.00 | 118          | 60                   |
| VCK 15  | <i>GNAT2</i>         | ATCATAGGCACTGAGGG CTG      | 55.00 | ATGAAAATAGCTGCTTCT TCCC    | 40.91 | 129          | 60                   |
| VCK 15  | <i>ABCA4</i>         | CCAGCCCAGGAGACTGA G        | 66.67 | AGATGCCAAGGTGGTGAT TC      | 50.00 | 126          | 60                   |
| VCK 15  | <i>SCNN1<br/>A</i>   | GCTGGAGGCCACGCTAC          | 70.59 | CAGCTCCTTCACCACTCT CG      | 60.00 | 136          | 60                   |
| VCK 15  | <i>TULP4</i>         | GTCCTCTCCCTGACCGA AAG      | 60.00 | CCTCCTTCTTCACTTTGCC C      | 55.00 | 133          | 60                   |
| VCK 16  | <i>CTBP1</i>         | ACTGGGACAGAGGCTGCTC        | 63.16 | ACTGTGGCCTTCTGCGAC         | 61.11 | 177          | 60                   |
| VCK 16  | <i>DNAH2</i>         | TCATCACCCACCATCTA CTCAG    | 50.00 | CGCCGTTGATGAGGGTC          | 64.71 | 136          | 60                   |
| VCK 16  | <i>SPTBN<br/>5</i>   | CCTCTTCCCAGTGACCT G        | 63.16 | TTCAAGGCCTGAGAAGC AAG      | 50.00 | 123          | 60                   |

|           |                      |                                |           |                                 |           |     |    |
|-----------|----------------------|--------------------------------|-----------|---------------------------------|-----------|-----|----|
| VCK<br>16 | <i>TTL3</i>          | GTGGTGAGTGTGGGCAG<br>TC        | 63.<br>16 | AGTAGCAGCGTGGGAAG<br>AAG        | 55.<br>00 | 130 | 60 |
| VCK<br>17 | <i>IFT57</i>         | GTGTTCCACAATGCCAA<br>TTC       | 45.<br>00 | TGGGCTTAAGACAAAGTG<br>AGG       | 47.<br>62 | 182 | 60 |
| VCK<br>17 | <i>FAT4</i>          | AAAAGCCAATGATCAA<br>GCTG       | 40.<br>00 | CTGATGGGTCTGCAGCAA<br>G         | 57.<br>89 | 134 | 60 |
| VCK<br>17 | <i>CABYR</i>         | CACATCTTTGAAAGGTC<br>AGCC      | 47.<br>62 | TCCTGCCAGTATTGTCA<br>GAG        | 52.<br>38 | 135 | 60 |
| VCK<br>17 | <i>PKD1L<br/>1</i>   | GCCAAATGCAGAAGAC<br>AAGG       | 50.<br>00 | GATGCCTGTTTGGGACA<br>AG         | 50.<br>00 | 152 | 60 |
| VCK<br>18 | <i>LRP5</i>          | GCCTGGCTGAGTATTTCC<br>CTT      | 52.<br>38 | CGGTCCAGTAGAGGTTTC<br>GG        | 60.<br>00 | 383 | 60 |
| VCK<br>18 | <i>CC2D2<br/>A</i>   | TTTTCTTAGAGTCCTGAT<br>CCTGTT   | 40.<br>00 | TCCATCAGACAGGTTTG<br>GG         | 50.<br>00 | 140 | 60 |
| VCK<br>18 | <i>DNAH1</i>         | GGCTACTGCAGGACCAA<br>GTG       | 60.<br>00 | TCCATGCAGCGCTTGAG               | 58.<br>82 | 127 | 60 |
| VCK<br>18 | <i>KIF19</i>         | CACTGATCCTGCCCTTT<br>C         | 57.<br>89 | CCATCTTTGCCATGGGTG              | 55.<br>56 | 141 | 60 |
| VCK<br>18 | <i>PCDHB<br/>8</i>   | CTTCTCGGTGCTCCTGTT<br>CG       | 60.<br>00 | GAAAACAAGACAAATAC<br>TATGGGCA   | 36.<br>00 | 414 | 60 |
| VCK<br>18 | <i>PKHD1<br/>L1</i>  | TACGGTCACACTCCCTG<br>ATG       | 55.<br>00 | TCAGCATTCCAAATTC<br>CAC         | 38.<br>10 | 334 | 60 |
| VCK<br>18 | <i>RP1L1</i>         | TACGCTACTCTCCCTGA<br>GC        | 60.<br>00 | ACTCAGGCCTCTGGGAGC              | 66.<br>67 | 140 | 60 |
| VCK<br>18 | <i>TCTN3</i>         | GGTTGGTTTGTCCTCAA<br>CTG       | 50.<br>00 | GTCCTAAACATATTCGGC<br>CC        | 50.<br>00 | 133 | 60 |
| VCK<br>19 | <i>LRP2</i>          | GTGCGTCTCGTTTATCA<br>GC        | 50.<br>00 | CATTAGTAGGAAAATTGA<br>TGCCTAC   | 34.<br>62 | 208 | 60 |
| VCK<br>19 | <i>ALMS1</i>         | GAGTCTGAAATTAGGAG<br>AGCTGTG   | 45.<br>83 | AAGCGGTGCTGAGATA<br>CAC         | 55.<br>00 | 281 | 60 |
| VCK<br>19 | <i>CENPJ</i>         | CATACCACTCTTGCTCT<br>GGC       | 52.<br>38 | TCTTAGGTGATAATCTTGT<br>GTTGG    | 37.<br>50 | 178 | 60 |
| VCK<br>19 | <i>DNAH1<br/>0</i>   | CCAGAACCTTGAAAATC<br>CACC      | 47.<br>62 | CTCTTGAAATCGGAGGAT<br>GG        | 50.<br>00 | 115 | 60 |
| VCK<br>19 | <i>PKD1</i>          | GCGTGAAAGTTGTGTGTC<br>ACC      | 55.<br>00 | ACATCACGTGGACCTTCG<br>AC        | 55.<br>00 | 333 | 60 |
| VCK<br>20 | <i>CSNK1<br/>G1</i>  | AGCATTGAAACAAAGCC<br>CTC       | 45.<br>00 | CGGAGAGATGATTTGGA<br>AGC        | 50.<br>00 | 120 | 60 |
| VCK<br>20 | <i>FAT4</i>          | TGAAAACACACTTACTG<br>GAACAG    | 39.<br>13 | CACCTGTGACAGAGTCTA<br>TCCG      | 54.<br>55 | 137 | 60 |
| VCK<br>20 | <i>APC2</i>          | CACAGTCTCCCTTGTGTC<br>CC       | 60.<br>00 | GGTGGAGCTCCTCACTGT<br>C         | 63.<br>16 | 130 | 60 |
| VCK<br>20 | <i>MMP7</i>          | CTCATCGAAGTGAGCAT<br>CTCC      | 52.<br>38 | TTCTAGCCTCAATAATCG<br>TATAAACTG | 33.<br>33 | 190 | 60 |
| VCK<br>20 | <i>C2CD3</i>         | GCCTTGATGGAACCTGA<br>AAC       | 50.<br>00 | GGGGACATTCCITACAAT<br>CC        | 50.<br>00 | 272 | 60 |
| VCK<br>20 | <i>DNAH5</i>         | CTGAAATTAGGGCAGGG<br>AAC       | 50.<br>00 | CAGGTGCCTTCTACCAA<br>TG         | 55.<br>00 | 140 | 60 |
| VCK<br>20 | <i>DNAH1<br/>1</i>   | TGATAGAGGGAAGGAC<br>CCAC       | 55.<br>00 | ACATGTTGCATGGCATCT<br>TC        | 45.<br>00 | 141 | 60 |
| VCK<br>20 | <i>SPEF2</i>         | ATACAGCAGGCCAGAC<br>AACC       | 55.<br>00 | CATTAACAATTTCCGCCG<br>TC        | 45.<br>00 | 137 | 60 |
| VCK<br>20 | <i>TCTEX<br/>1D4</i> | TTTTGCAGAATTGGACTC<br>CC       | 45.<br>00 | TGCAGTGTGGTGCTGGG               | 64.<br>71 | 175 | 60 |
| VCK<br>21 | <i>IFT88</i>         | TCAGAATTTTAAAGCTA<br>ATCCATGTC | 30.<br>77 | CAGATTTGGTGCCATGCT<br>C         | 52.<br>63 | 141 | 60 |
| VCK<br>21 | <i>DNAH1</i>         | CCGAGTACGAGTGCTTC<br>CAG       | 60.<br>00 | AAGAGGAAGGTGATGGG<br>TAGG       | 52.<br>38 | 121 | 60 |
| VCK<br>21 | <i>MAK</i>           | CGGATTCATTACTCTTGC<br>CC       | 50.<br>00 | TTCAACAAGGAAGTCATT<br>TCAATC    | 33.<br>33 | 132 | 60 |
| VCK<br>22 | <i>PTCH2</i>         | CCTTCTACCCAGAGCTG<br>TTCC      | 57.<br>14 | GGGATCCAGAGACATTGT<br>GG        | 55.<br>00 | 119 | 60 |
| VCK<br>22 | <i>SPEF2</i>         | CATGTTCCGCATGAAAA<br>GG        | 47.<br>37 | CAAAATATAGCTTTGTTT<br>ACCACG    | 33.<br>33 | 191 | 60 |

**Table S2:** Genetic variants in Shh-signalling pathway genes with predicted damaging potential in patient cohort, “-” shows no prediction was possible because of the frameshift or nonsense character of the genetic variant.

| Gene           | Variant                       | gnomAD allele frequency | PPH2              | SIFT      | Provean     | Affected Patient |
|----------------|-------------------------------|-------------------------|-------------------|-----------|-------------|------------------|
| <i>GLI1</i>    | c.3307delA<br>p.N1103T fsTer7 | ~0.000006               | -                 | -         | -           | VCK6             |
| <i>PTCH2</i>   | c.203G->T<br>p.A68D           | ~0.00001                | Probably damaging | Damaging  | Deleterious | VCK22            |
|                | c.247C->T<br>p.E83K           | ~0.00003                | Probably damaging | Damaging  | Deleterious | VCK1             |
| <i>IFT172</i>  | c.3400G->A<br>p.R1134W        | ~0.0002                 | Probably damaging | Damaging  | Deleterious | VCK1             |
| <i>IFT57</i>   | c.1119C->A<br>p.L373F         | ~0.0001                 | Probably damaging | Damaging  | Deleterious | VCK17            |
| <i>IFT88</i>   | c.884G->C<br>p.G295A          | Unknown                 | Probably damaging | Damaging  | Deleterious | VCK21            |
| <i>LRP2</i>    | c.2356C->T<br>p.V786I         | ~0.000008               | Probably damaging | Tolerated | Neutral     | VCK19            |
| <i>CSNK1G1</i> | c.745G->A<br>p.L249F          | Unknown                 | Probably damaging | Damaging  | Deleterious | VCK20            |
| <i>DZIP1</i>   | c.1033C->G<br>p.D345H         | Unknown                 | Probably damaging | Damaging  | Deleterious | VCK2             |
| <i>IQCE</i>    | c.1045A->G<br>p.K349E         | Unknown                 | Probably damaging | Damaging  | Deleterious | VCK4             |
| <i>OFD1</i>    | c.974_975insT<br>p.E326*      | Unknown                 | -                 | -         | -           | VCK14            |

**Table S3:** Genetic variants in Wnt-signalling pathway genes with predicted damaging potential in patient cohort, “-” shows no prediction was possible because of the frameshift or nonsense character of the genetic variant.

| Gene     | Variant                      | gnomAD allele frequency | PPH2              | SIFT      | Provean     | Affected Patient |
|----------|------------------------------|-------------------------|-------------------|-----------|-------------|------------------|
| FAT1     | c.4433 A->G<br>p.I1478T      | ~0.00009                | Possibly damaging | Damaging  | Deleterious | VCK1             |
|          | c.12899 G->A<br>p.A4300V     | ~0.00001                | Probably damaging | Tolerated | Neutral     | VCK4             |
| FAT2     | c.4028G->A<br>p.S1343F       | ~0.000004               | Probably damaging | Damaging  | Deleterious | VCK5             |
| FAT4     | c.6532G->A<br>p.A2178T       | ~0.0002                 | Possibly damaging | Damaging  | Deleterious | VCK5             |
|          | c.4543G->A<br>p.V1515M       | ~0.00005                | Probably damaging | Damaging  | Neutral     | VCK17            |
|          | c.6562C->T<br>p.Q2188Stop    | Unknown                 | -                 | -         | -           | VCK20            |
| APC2     | c.1463G->A<br>p.R488H        | ~0.0001                 | Probably damaging | Damaging  | Deleterious | VCK20            |
| MMP7     | c.487G->A<br>p.H163Y         | ~0.000004               | Probably damaging | Damaging  | Deleterious | VCK20            |
| LRP5     | c.1192C->T<br>p.R398C        | ~0.00007                | Probably damaging | Damaging  | Deleterious | VCK18            |
| CTBP1    | c.204_205insA<br>p.G69Rfs*78 | ~0.00002                | -                 | -         | -           | VCK16            |
| PLCB3    | c.3418G->C<br>p.E1140Q       | ~0.0002                 | Probably damaging | Tolerated | Neutral     | VCK13            |
| AXIN1    | c.1378G->A<br>p.R460W        | ~0.00005                | Probably damaging | Damaging  | Neutral     | VCK3             |
| SOX7     | c.203C->T<br>p.G68E          | ~0.00001                | Probably damaging | Damaging  | Deleterious | VCK6             |
| KREMEN2  | c.326T->G<br>p.I109S         | Unknown                 | Probably damaging | Damaging  | Deleterious | VCK10            |
| AP2A2    | c.742A->G<br>p.T248A         | ~0.000004               | Probably damaging | Tolerated | Deleterious | VCK10            |
| AES/TLE5 | c.200C->T<br>p.W67Stop       | ~0.00003                | -                 | -         | -           | VCK14            |
| GNAT2    | c.633C->G<br>p.W211C         | Unknown                 | Probably damaging | Damaging  | Deleterious | VCK15            |

**Table S4:** Genetic variants in ciliary genes with predicted damaging potential in patient cohort, “-” shows no prediction was possible because of the frameshift or nonsense character of the genetic variant.

| Gene     | Variant     | gnomAD allele frequency | PPH2              | SIFT      | Provean     | Affected Patient |
|----------|-------------|-------------------------|-------------------|-----------|-------------|------------------|
| ABCA4    | c.3292G->A  | ~0.00002                | Probably damaging | Damaging  | Deleterious | VCK15            |
|          | p.R1098C    |                         |                   |           |             |                  |
| ALMS1    | c.770T->G   | Unknown                 | Probably damaging | Damaging  | Deleterious | VCK19            |
|          | p.I257S     |                         |                   |           |             |                  |
| BBS10    | c.1838T->C  | ~0.00003                | Probably damaging | Damaging  | Deleterious | VCK8             |
|          | p.Y613C     |                         |                   |           |             |                  |
| C2CD3    | c.519G->T   | ~0.00002                | -                 | -         | -           | VCK20            |
|          | p.Y173Stop  |                         |                   |           |             |                  |
| CABYR    | c.941G->A   | ~0.000008               | Probably damaging | Damaging  | Neutral     | VCK17            |
|          | p.G314D     |                         |                   |           |             |                  |
| CACNA1F  | c.761A->G   | ~0.00006                | Probably damaging | Damaging  | Deleterious | VCK13            |
|          | p.I254T     |                         |                   |           |             |                  |
|          | c.1234C->T  | ~0.00002                | Probably damaging | Damaging  | Deleterious | VCK14            |
|          | p.E412K     |                         |                   |           |             |                  |
| CATSPERG | c.3193C->T  | ~0.00003                | Probably damaging | Damaging  | Deleterious | VCK5             |
|          | p.R1065W    |                         |                   |           |             |                  |
| CC2D2A   | c.3055C->T  | ~0.0001                 | -                 | -         | -           | VCK18            |
|          | p.R1019Stop |                         |                   |           |             |                  |
| CCDC63   | c.983C->T   | Unknown                 | Probably damaging | Damaging  | Neutral     | VCK11            |
|          | p.A328V     |                         |                   |           |             |                  |
| CENPJ    | c.3532G->A  | ~0.000008               | -                 | -         | -           | VCK19            |
|          | p.R1178Stop |                         |                   |           |             |                  |
| CNGB3    | c.1582C->A  | ~0.00001                | -                 | -         | -           | VCK6             |
|          | p.E528Stop  |                         |                   |           |             |                  |
| DNAH1    | c.7441G->A  | Unknown                 | Probably damaging | Damaging  | Deleterious | VCK18            |
|          | p.V2481M    |                         |                   |           |             |                  |
|          | c.7865G->A  | ~0.0003                 | Probably damaging | Damaging  | Deleterious | VCK21            |
|          | p.R2622Q    |                         |                   |           |             |                  |
| DNAH2    | c.4648C->T  | ~0.000004               | -                 | -         | -           | VCK1             |
|          | p.R1550Stop |                         |                   |           |             |                  |
|          | c.6528G->C  | ~0.00003                | Probably damaging | Damaging  | Deleterious | VCK3, VCK16      |
|          | p.E2176D    |                         |                   |           |             |                  |
| DNAH5    | c.11476G->A | ~0.00034                | Probably damaging | Damaging  | Deleterious | VCK2             |
|          | p.L3826F    |                         |                   |           |             |                  |
|          | c.9244G->T  | ~0.0006                 | Probably damaging | Damaging  | Neutral     | VCK20            |
|          | p.L3082I    |                         |                   |           |             |                  |
| DNAH10   | c.1716A->G  | ~0.000008               | Probably damaging | Damaging  | Deleterious | VCK19            |
|          | p.I572M     |                         |                   |           |             |                  |
| DNAH11   | c.8452T->C  | Unknown                 | Probably damaging | Tolerated | Deleterious | VCK20            |
|          | p.Y2818H    |                         |                   |           |             |                  |
|          | c.7729G->A  | Unknown                 |                   | Damaging  | Deleterious | VCK11            |

|         |                 |           |                      |           |             |       |
|---------|-----------------|-----------|----------------------|-----------|-------------|-------|
|         | p.D2577N        |           | Probably<br>damaging |           |             |       |
| DZIP1   | c.1033C->G      | Unknown   | Probably<br>damaging | Damaging  | Deleterious | VCK2  |
|         | p.D345H         |           |                      |           |             |       |
| EFHC1   | c.737A->G       | ~0.000008 | Probably<br>damaging | Damaging  | Deleterious | VCK5  |
|         | p.Y246C         |           |                      |           |             |       |
| EZR     | c.146T->C       | ~0.00002  | Probably<br>damaging | Damaging  | Deleterious | VCK10 |
|         | p.Y49C          |           |                      |           |             |       |
| GLI1    | c.3307delA      | ~0.000006 | -                    | -         | -           | VCK6  |
|         | p.N1103T fsTer7 |           |                      |           |             |       |
| GNAT2   | c.633C->G       | Unknown   | Probably<br>damaging | Damaging  | Deleterious | VCK15 |
|         | p.W211C         |           |                      |           |             |       |
| IFT57   | c.1119C->A      | ~0.0001   | Probably<br>damaging | Damaging  | Deleterious | VCK17 |
|         | p.L373F         |           |                      |           |             |       |
| IFT88   | c.884G->C       | Unknown   | Probably<br>damaging | Damaging  | Deleterious | VCK21 |
|         | p.G295A         |           |                      |           |             |       |
| IFT172  | c.3400G->A      | ~0.0002   | Probably<br>damaging | Damaging  | Deleterious | VCK1  |
|         | p.R1134W        |           |                      |           |             |       |
| IQCE    | c.1045A->G      | Unknown   | Probably<br>damaging | Damaging  | Deleterious | VCK4  |
|         | p.K349E         |           |                      |           |             |       |
| KIF19   | c.2920C->T      | ~0.00008  | -                    | -         | -           | VCK18 |
|         | p.R974Stop      |           |                      |           |             |       |
| KLC3    | c.509G->A       | ~0.00007  | Probably<br>damaging | Tolerated | Neutral     | VCK2  |
|         | p.R170H         |           |                      |           |             |       |
| MAK     | c.10_11insATCG  | Unknown   | -                    | -         | -           | VCK21 |
|         | p.T5Rfs*21      |           |                      |           |             |       |
| NEK8    | c.1223_1223delA | Unknown   | -                    | -         | -           | VCK1  |
|         | p.D408Afs*6     |           |                      |           |             |       |
| NPHP4   | c.3895C->T      | ~0.0001   | Probably<br>damaging | Tolerated | Deleterious | VCK11 |
|         | p.G1299S        |           |                      |           |             |       |
| OFD1    | c.974_975insT   | Unknown   | -                    | -         | -           | VCK14 |
|         | p.E326*         |           |                      |           |             |       |
| PCDHB8  | c.2203G->A      | ~0.00001  | Probably<br>damaging | Damaging  | Deleterious | VCK18 |
|         | p.G735R         |           |                      |           |             |       |
| PCM1    | c.3841A->C      | ~0.000008 | Probably<br>damaging | Damaging  | Neutral     | VCK9  |
|         | p.K1281Q        |           |                      |           |             |       |
| PGK2    | c.509T->A       | ~0.0005   | Probably<br>damaging | Damaging  | Deleterious | VCK4  |
|         | p.H170L         |           |                      |           |             |       |
| PKD1    | c.3994C->T      | ~0.0002   | Probably<br>damaging | Tolerated | Deleterious | VCK19 |
|         | p.D1332N        |           |                      |           |             |       |
| PKD1L1  | c.5125C->G      | ~0.0002   | Probably<br>damaging | Damaging  | Deleterious | VCK17 |
|         | p.G1709R        |           |                      |           |             |       |
| PKHD1L1 | c.7204T->C      | ~0.001    | Probably<br>damaging | Damaging  | Deleterious | VCK18 |
|         | p.W2402R        |           |                      |           |             |       |
| POC1A   | c.1085G->A      | ~0.0002   | Probably<br>damaging | Damaging  | Deleterious | VCK13 |
|         | p.T362M         |           |                      |           |             |       |
| RP1L1   | c.3569G->A      | ~0.0001   |                      | Damaging  | Neutral     | VCK18 |

|          |            |          |                      |           |             |       |
|----------|------------|----------|----------------------|-----------|-------------|-------|
|          | p.T1190M   |          | Probably<br>damaging |           |             |       |
| SCNN1A   | c.745G->A  | ~0.0001  | Probably<br>damaging | Damaging  | Deleterious | VCK15 |
|          | p.R249C    |          |                      |           |             |       |
|          | c.744C->A  | ~0.0001  | Probably<br>damaging | Tolerated | Neutral     |       |
|          | p.Q248H    |          |                      |           |             |       |
| SPEF2    | c.1159C->G | ~0.00003 | Probably<br>damaging | Damaging  | Deleterious | VCK22 |
|          | p.R387G    |          |                      |           |             |       |
|          | c.887G->A  | ~0.00001 | Probably<br>damaging | Damaging  | Deleterious | VCK20 |
|          | p.R296H    |          |                      |           |             |       |
| SPTBN5   | c.4243G->C | ~0.00004 | Probably<br>damaging | Damaging  | Deleterious | VCK16 |
|          | p.L1415V   |          |                      |           |             |       |
| TCTEX1D4 | c.601A->G  | ~0.0001  | Probably<br>damaging | Damaging  | Deleterious | VCK20 |
|          | p.S201P    |          |                      |           |             |       |
| TCTN3    | c.978A->C  | Unknown  | -                    | -         | -           | VCK18 |
|          | p.Y326Stop |          |                      |           |             |       |
| TTBK2    | c.3418G->A | ~0.00006 | Probably<br>damaging | Tolerated | Neutral     | VCK7  |
|          | p.P1140S   |          |                      |           |             |       |
| TTLL3    | c.766C->T  | ~0.0001  | Probably<br>damaging | Damaging  | Deleterious | VCK16 |
|          | p.R256W    |          |                      |           |             |       |
| TULP4    | c.4012C->G | Unknown  | Probably<br>damaging | Damaging  | Deleterious | VCK15 |
|          | p.R1338G   |          |                      |           |             |       |
